# Supplementary material
Source: Springer Nature journal article supplement (https://www.springermedizin.de/resource/supplementary/12986_2013_553_MOESM3_ESM.pdf/25655010)

**A** **OCTN2**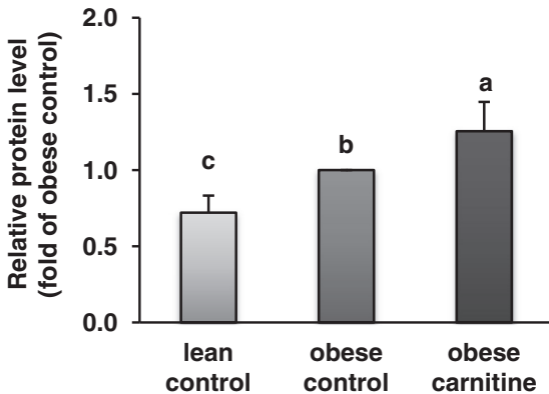**B**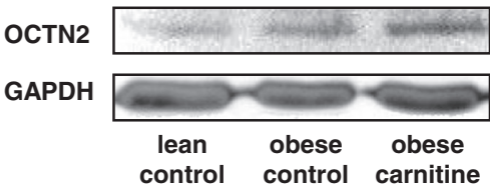

Supplement: MOESM3 [file 25655010]
